1           **Practical gradient non-linearity correction of multi-site diffusion**  
2                           **weighted MRI with empirical field maps**

3  
4           Colin B. Hansen\*<sup>1</sup>, Baxter P. Rogers\*<sup>2,3</sup>, Kurt G. Schilling<sup>2</sup>, Vishwesh Nath<sup>1</sup>,  
5           Justin A. Blaber<sup>4</sup>, Okan Irfanoglu<sup>5</sup>, Alan Barnett<sup>5</sup>, Carlo Pierpaoli<sup>5</sup>,  
6           Adam W. Anderson<sup>2,3</sup>, Bennett A. Landman<sup>1,2,3,4</sup>

7  
8                           <sup>1</sup>Computer Science, Vanderbilt University, Nashville, TN, USA;

9           <sup>2</sup>Department of Radiology and Radiological Sciences, Vanderbilt University Medical Center,  
10                           Nashville, TN USA;

11           <sup>3</sup>Department of Biomedical Engineering, Vanderbilt University, Nashville, TN USA;

12                           <sup>4</sup>Electrical Engineering, Vanderbilt University, Nashville, TN, USA;

13           <sup>5</sup>National Institute of Biomedical Imaging and Bioengineering, Bethesda MD USA;

14  
15                                           *Corresponding Author:*

16                                           *Colin Hansen*

17                                           *PhD Student*

18                                           *Computer Science, Vanderbilt University*

19                                           *Email: colin.b.hansen@vanderbilt.edu*

20  
21  
22   **ACKNOWLEDGEMENTS**

23   This work was supported by the National Institutes of Health under award numbers  
24   R01EB017230, and T32EB001628, and in part by the National Center for Research Resources,  
25   Grant UL1 RR024975-01. The content is solely the responsibility of the authors and does not  
26   necessarily represent the official views of the NIH.

30

## ABSTRACT

31 **Background:** Achieving inter-site / inter-scanner reproducibility of diffusion weighted magnetic  
32 resonance imaging (DW-MRI) metrics has been challenging given differences in acquisition  
33 protocols, analysis models, and hardware factors.

34 **Purpose:** Gradient fields impart scanner-dependent spatial variations in the applied diffusion  
35 weighting that can be corrected if the gradient non-linearities are known. However, retrieving  
36 manufacturer non-linearity specifications is not well supported and may introduce errors in  
37 interpretation of units or coordinate systems. We propose an empirical approach to mapping the  
38 gradient nonlinearities with sequences that are supported across the major scanner vendors.

39 **Study Type:** Prospective observational study

40 **Subjects:** Two diffusion phantoms (High Precision Devices diffusion phantom and a custom  
41 isotropic phantom), five human control volunteers

42 **Field Strength/Sequence:** 3T (three scanners). Stejskal-Tanner spin echo sequence with b-values  
43 of 1000, 2000  $\text{s}/\text{mm}^2$  with 12 and 32 diffusion gradient directions per shell.

44 **Assessment:** We compare the proposed correction with the prior approach using manufacturer  
45 specifications against typical diffusion pre-processing pipelines (i.e., ignoring spatial gradient non-  
46 linearities). In phantom data, we evaluate metrics against the ground truth. In human and phantom  
47 data, we evaluate reproducibility across scans, sessions, and hardware.

48 **Statistical Tests:** Wilcoxon rank-sum test between uncorrected and corrected data.

49 **Results:** In phantom data, our correction method reduces variation in metrics across sessions over  
50 uncorrected data ( $p < 0.05$ ). In human data, we show that this method can also reduce variation in  
51 mean diffusivity across scanners ( $p < 0.05$ ).

52 **Conclusion:** Our method is relatively simple, fast, and can be applied retroactively. We advocate  
53 incorporating voxel-specific b-value and b-vector maps should be incorporated in DW-MRI  
54 harmonization preprocessing pipelines to improve quantitative accuracy of measured diffusion  
55 parameters.

56 **Keywords:** Gradient Non-linearity, Field Estimation, Pre-processing, DW-MRI

57

58

## INTRODUCTION

59 Physical constraints of gradient coil designs result in a nonuniform magnetic field gradients during  
60 acquisition. This leads to spatial image warping [1-4] in magnetic resonance images and gradient  
61 distortion in diffusion weighted magnetic resonance imaging (DW-MRI) [5-9]. The introduced  
62 spatial variation can impact estimated diffusion tensor information [10] or high-angular resolution  
63 diffusion measurements [11]. Bammer et al. show in extreme cases the gradient nonuniformity can  
64 lead to an overestimation in the diffusion coefficient up to 30% and an underestimation up to 15%  
65 [12]. The effect's severity increases with distance from the magnet's isocenter [12] and with higher  
66 gradient amplitudes [12, 13]. The artifact becomes especially troubling for multi-site studies that  
67 have varying scanner models and manufacturers [14] and for studies utilizing very large gradient  
68 amplitudes such as in the human connectome project (HCP) which utilized amplitudes up to 300  
69 mT/m [13, 15, 16]. Recent work has shown the effect of gradient nonlinearities in the HCP cohort  
70 results in considerable bias in tractography results and potentially incorrect interpretations in  
71 group-wise studies [17].

72 Various estimates of the coil field nonlinearities have been applied to improve accuracy within  
73 and across sites [18-21]. An adaptive correction of diffusion information proposed by Bammer et  
74 al. relies on calculating the spatially varying gradient coil  $L$ . This approach is achieved by relating  
75 the actual gradients with the desired gradients [12], and has become standard practice [22, 23].  
76 However, this approach assumes that the gradient calibration specified by the manufacturer is  
77 readily available. Spherical harmonics (SH) based techniques are already implemented by  
78 manufacturers in the scanning systems to account for the spatial image warping effects of gradient

79 nonlinearities [1, 24-26]. Yet the SH coefficients are not usually provided to regular users and may  
80 be subject to non-disclosure criteria.

81 To remove the need for the manufacturer supplied specifications, we demonstrate an empirical  
82 field-mapping procedure which can be universally applied across platform as defined by Rogers  
83 et al. [27, 28]. At two scanner (scanner A and scanner B), a large oil-filled phantom is used to  
84 measure the magnetic field produced by each gradient coil. To estimate the achieved diffusion  
85 gradient directions and b-values on a voxel-wise basis, solid harmonic basis functions are fit to the  
86 measured magnetic field. The measured diffusivity (MD) and fractional anisotropy (FA) are  
87 compared without nonlinearity correction, with nonlinearity correction using estimated fields, and  
88 with nonlinearity correction using fields specified by the manufacturer for an ice-water diffusion  
89 phantom. The reproducibility is compared between without nonlinearity correction and with  
90 nonlinearity correction with the estimated fields for a subject scanned at two positions within the  
91 scanner at scanner A. We show that our method removes the need for manufacturer specified SH  
92 coefficients and that the method reduces MD reproducibility error in-vivo when the effect of  
93 gradient nonlinearities is clearly present.

## 94 **METHODS**

### 95 **Gradient coil field measurements**

96 Data were acquired across two scanners. Scanner A and scanner B are both 3 Tesla MRI systems  
97 on which a phantom is used to estimate the gradient coil fields. The phantom is 24 liters of a  
98 synthetic white oil (SpectraSyn 4 polyalphaolefin, ExxonMobil) in a polypropylene carboy with a  
99 diameter of 290mm and a height of 500mm [28]. The phantom was placed at scanner isocenter

100 and imaged with a dual echo EPI-based field mapping sequence. Images are acquired at two echo  
101 times 1ms apart, and the fieldmap is computed from the phase difference of the two images. Four  
102 field maps were acquired, one with shim field set to 0.05 mT/m on each axis X, Y, Z plus a final  
103 image with gradient coil shim fields set to zero. Each used a 384 mm field of view with 4 mm  
104 isotropic voxel size. Total scan time was approximately 5 minutes. Gradient coil fields were  
105 estimated by subtracting the zero-shim field map from each coil's respective 0.05 mT/m field map.  
106 Field maps were acquired on 40 dates over the course of a year at scanner B while scanner A only  
107 one session was acquired with the fieldmapping phantom.

108 We modeled each coil's field as a sum of solid harmonics [12, 29, 30] to 3rd order, excluding even  
109 order terms due to the coils' physical symmetry. These basis functions were fit to the field  
110 measurements with robust least squares, using all voxels within a 270 mm diameter sphere at  
111 isocenter. The result was an analytically differentiable estimate of the true magnetic field produced  
112 by each gradient coil (Figure 1). This fitting procedure was performed on an average field map  
113 derived from a series of scans and on the scanner manufacturer's estimate of the coil fields as  
114 measured during manufacturing and installation. The series of scans which are averaged are  
115 defined for each subject session according to the closest 10 field map sessions in terms of date for  
116 scanner B whereas 10 acquisitions were acquired within a single session at scanner A which are  
117 averaged.

### 118 **Estimating achieved b-values and gradient directions**

119 A spatially varying tensor  $L$  relates the achieved gradient to the intended gradient [12]:

120

$$L = \begin{bmatrix} \frac{\partial B_z^{(x)}}{\partial x} & \frac{\partial B_z^{(y)}}{\partial x} & \frac{\partial B_z^{(z)}}{\partial x} \\ \frac{\partial B_z^{(x)}}{\partial y} & \frac{\partial B_z^{(y)}}{\partial y} & \frac{\partial B_z^{(z)}}{\partial y} \\ \frac{\partial B_z^{(x)}}{\partial z} & \frac{\partial B_z^{(y)}}{\partial z} & \frac{\partial B_z^{(z)}}{\partial z} \end{bmatrix}$$

121 where  $B_z^{(x)}$  is the z component of the magnetic field produced by unit amplitude of a nominal x  
122 gradient, and similarly for (y) and (z). This tensor may be computed analytically from the solid  
123 harmonic approximation to the measured field, then evaluated at spatial locations of interest. In  
124 the common situation where the scanner reports the intended gradient direction and amplitude but  
125 the full b-matrix [31-33] is not known, an approximate correction to adjust the intended gradient  
126  $G$  for the coil nonlinearity is [18]:

127

$$G' = LG$$

128 This estimate of the achieved gradient can then be expressed as the product of an adjusted scalar  
129 b-value and a unit vector,  $G' = \sqrt{b}g'$ . Importantly, this is spatially varying and processing occurs  
130 voxelwise, but otherwise this may be used in any desired way for further processing of the  
131 diffusion images.

132

## EXPERIMENTS

133 This section describes the set of analyses which aim to show the accuracy of the estimated fields  
134 as well as their impact on resulting DW-MRI metrics in phantom and human data. All DW-MRI  
135 are corrected for susceptibility distortion [34] and eddy current distortion [15] using FSL.

## 136 **Empirically Estimated Fieldmaps**

137 Gradient non-linearity correction is only viable if we can depend on the estimation to match the  
138 true fields. To investigate if the magnitude estimated fieldmaps closely approximate the true fields,  
139 we compare them to the fieldmaps specified by the manufacturer on scanner B. For comparison,  
140 we take the average fieldmap from the latest 10 oil phantom scans on scanner B and calculate the  
141 voxel-wise difference between this and the manufacturer specified fields. To evaluate the stability  
142 of the empirical estimations, we report the variance across fields estimated from 40 individual oil  
143 phantom scans acquired over time on scanner B. All evaluations on the empirical fields use a  
144 spherical mask with a radius of 135mm from isocenter.

## 145 **Polyvinylpyrrolidone (PVP) phantom**

146 To evaluate the intra-scanner performance of the gradient field nonlinearity correction with the  
147 empirical fieldmaps in a controlled environment, we use a 43% Polyvinylpyrrolidone (PVP)  
148 aqueous solution in a sealed spherical container (PVP phantom) [35]. The PVP phantom is a large  
149 homogeneous material, and estimated metrics are expected to be the same across the entire volume.  
150 At scanner B, the phantom was scanned at three positions within the magnet: superior (6cm above  
151 isocenter), isocenter, and inferior (6cm below isocenter). At each position twelve directions were  
152 acquired at a b-value of 1000 s/mm<sup>2</sup> and twelve more were acquired at 2000 s/mm<sup>2</sup>. Susceptibility  
153 distortion correction and eddy current distortion correction are applied without movement  
154 correction. Resulting signal to noise ratio (SNR) at isocenter, superior position, and inferior  
155 position are 89.65, 111.92, and 86.87 respectively. Using all diffusion volumes at each position,  
156 FA and MD are calculated without and with gradient nonlinearity correction using the empirically  
157 derived fields. We report error without and with nonlinearity correction in terms of reproducibility



158 across the three sessions as we would for a human subject. This is done by first registering all non-  
159 diffusion volumes to a structural T1 image using a rigid body transform restricted to only use  
160 translations. Then we calculate the RMSE between each position and take the average RMSE for  
161 each voxel. By acquiring in the three positions in the magnet, we are simulating the worst possible  
162 effects of gradient nonlinearity in the z direction.

163

### 164 **Human repositioned**

165 To evaluate the inter-scanner performance of the gradient field nonlinearity correction with the  
166 empirical fieldmaps in-vivo, we scanned a single subject at scanner A and scanner B. At scanner  
167 B, two sessions were acquired of the subject with one session acquired with the subject positioned  
168 at isocenter within the magnet and one session acquired with the subject positioned 6cm superior  
169 from isocenter. At scanner A, only one session is acquired at isocenter. Each session consisted of  
170 twelve gradient directions at a b-value of 1000 s/mm<sup>2</sup> and twelve at a b-value of 2000 s/mm<sup>2</sup>.  
171 Susceptibility distortion correction and eddy current distortion correction are applied with  
172 movement correction for each session. Using all diffusion volumes from each session, FA and MD  
173 are calculated without and with gradient nonlinearity correction using the empirically derived  
174 fields. For analysis the subject's scans are registered using FSL Flirt [36]. We report error without  
175 and with nonlinearity correction in terms of reproducibility error which is in this case the absolute  
176 error between MD or FA across scanners.

177

## RESULTS

### 178 **Empirically Estimated Fieldmaps**

179 There is small, mostly homogeneous difference between the manufacturer and the measured field  
180 produced by the gradient coil. These are shown in Figure 1 in units of mm which are  $\mu\text{T}/(\text{mT}/\text{m})$ .  
181 On average the difference at a given voxel is approximately  $1 \mu\text{T}/(\text{mT}/\text{m})$  in the x and y gradient  
182 fields and  $2 \mu\text{T}/(\text{mT}/\text{m})$  in the z gradient field within 135mm of isocenter. The average standard  
183 deviation at a given voxel is approximately  $4 \mu\text{T}/(\text{mT}/\text{m})$  in the x and y fields and  $6 \mu\text{T}/(\text{mT}/\text{m})$  in  
184 the z field within 135mm of isocenter.

### 185 **PVP phantom**

186 We see a large decrease in reproducibility error with nonlinearity correction in both FA and MD  
187 across sessions (Figure 2). This is especially evident in superior axial slice in MD. In MD, we see  
188 an approximately 66% decrease in the median reproducibility error with nonlinearity correction.  
189 In FA, this is approximately 53%. Additionally, because we know the phantom to be an isotropic  
190 substance, we report a 25% decrease in the median FA value across all sessions with nonlinearity  
191 correction.

### 192 **Human repositioned**

193 To evaluate the correction's effect on inter-scanner reproducibility in-vivo, we evaluate the  
194 absolute error between MD and FA from a single session acquired at scanner A and scanner B of  
195 a human subject. First, we look at typical acquisitions which are acquired with the subject  
196 positioned at isocenter within the magnet at both scanners. Figure 3 shows the MD without

197 nonlinearity correction and the change in MD with nonlinearity correction for both scanners as  
198 well as the resulting error in MD without and with nonlinearity correction. The difference between  
199 the errors is shown in Figure 4. We find that in the superior axial slices around the edges of the  
200 brain where MD is decreased at both scanners with nonlinearity correction, the error is also  
201 generally decreased with nonlinearity correction. However, it is not clear in the inferior slices  
202 where the MD is increased at both scanners with nonlinearity correction how the correction  
203 impacts reproducibility error. Figure 5 shows the median percent change in error for each region  
204 as defined by BrainCOLOR and the JHU white matter atlas for FA and MD as well as the  
205 distribution of error without and with nonlinearity correction for hierarchical BrainCOLOR  
206 regions. While there are some regions which have large relative changes, overall there is not a big  
207 shift in error. Across the entire brain volume, the MD reproducibility error increased by  
208 approximately 1.8% with nonlinearity correction, and the FA reproducibility error remains  
209 approximately unchanged.

210 Second, we look at a situation in which a typical acquisition is acquired at scanner A and an  
211 atypical acquisition is acquired at scanner B where the subject is positioned 6cm superior from  
212 isocenter. Figure 6 shows the MD without nonlinearity correction and the change in MD with  
213 nonlinearity correction for both scanners as well as the resulting error in MD without and with  
214 nonlinearity correction. The difference between the errors is shown in Figure 7. Again, where the  
215 correction increases the resulting MD at scanner A in the inferior axial slices, the overall change  
216 in error is obscured, but it is clear in the superior slices where MD is increased at scanner B that  
217 the correction significantly decreases error. Figure 8 shows the median percent change in error for  
218 each region as defined by BrainCOLOR and the JHU white matter atlas for FA and MD as well as

219 the distribution of error without and with nonlinearity correction for hierarchical BrainCOLOR  
220 regions. While FA is largely unaffected, the MD error is decreased for most regions. Across the  
221 entire brain volume, the MD reproducibility error is decreased by approximately 7.1% with  
222 nonlinearity correction, and the FA reproducibility error remains approximately unchanged.

## 223 **DISCUSSION**

224 In comparing the empirically estimated fields to the fields specified by the manufacturer, we find  
225 that our approximations are very similar. The largest differences are in the z gradient field which  
226 corresponds to the largest variations in all of the estimated fields across 40 oil phantom  
227 acquisitions. In this study we use an average fieldmap across 10 acquisitions, but this should not  
228 be necessary as the field produced by the gradient coil depends only on the coil geometry and the  
229 current flowing in the coils. The current depends on the gain settings which may be changed by  
230 the site engineer, but unaltered system need only acquire the fields once for this method. Further  
231 study on the stability of the empirical mapping may be necessary. Additionally, further study on  
232 the stability of the fit of the spherical harmonics and the need for higher order basis may be  
233 necessary.

234 The PVP phantom experiment shows us that the use of the empirically derived fieldmaps are very  
235 effective at reducing intra-scanner reproducibility in a controlled environment when variation is  
236 introduced to subject position within the magnet. It also shows that the correction reduces bias in  
237 the computed diffusion parameters. In a typical acquisition of in-vivo brain tissue of a single  
238 subject, our results show that the correction has very little effect on the resulting MD and FA inter-

239 scanner reproducibility. However, when the positional variation is introduced, the improvement of  
240 MD becomes obvious.

241 In recent work, another approach is proposed for correcting voxel-wise b-value errors. Instead of  
242 correcting for gradient nonlinearities in the coil, this method directly estimates a voxel-wise b-  
243 value map that is used to correct resulting diffusion metrics [37]. While this method could account  
244 for errors that stem from other sources of deviation than just gradient nonlinearities, the model  
245 requires an estimation of more parameters and likely it would be best practice to acquire a  
246 calibration scan along with every subject acquisition. In comparison to apply the approach  
247 proposed in this work, only a single calibration scan is necessary for each system.

## 248 **CONCLUSION**

249 This work shows that the errors caused by gradient non-linearities is apparent in metrics derived  
250 from DW-MRI but can be reduced using the correction outlined by Bammer et al. Using  
251 empirically derived fields, we are able to achieve similar results without needing manufacturer  
252 specification of the hardware. In both phantom and in-vivo data, error in MD can be significantly  
253 reduced by applying this correction. We advocate for the use of gradient non-linearity correction  
254 in standard diffusion preprocessing pipelines and provide a simple method for empirically  
255 measuring the fields necessary to account for the achieved b-values and b-vectors.

256

257   **REFERENCES**

- 258   1.     Glover, G.H. and N.J. Pelc, *Method for correcting image distortion due to gradient*  
259         *nonuniformity*. 1986, Google Patents.
- 260   2.     Michiels, J., et al., *On the problem of geometric distortion in magnetic resonance images*  
261         *for stereotactic neurosurgery*. *Magnetic resonance imaging*, 1994. **12**(5): p. 749-765.
- 262   3.     Sumanaweera, T., et al., *Quantifying MRI geometric distortion in tissue*. *Magnetic*  
263         *resonance in medicine*, 1994. **31**(1): p. 40-47.
- 264   4.     Langlois, S., et al., *MRI geometric distortion: a simple approach to correcting the effects*  
265         *of non-linear gradient fields*. *Journal of Magnetic Resonance Imaging: An Official Journal*  
266         *of the International Society for Magnetic Resonance in Medicine*, 1999. **9**(6): p. 821-831.
- 267   5.     LeBihan, D. and R. Tumer, *Diffusion and perfusion, magnetic resonance imaging*, *Mozbey*  
268         *Year Book*. 1992, Inc.
- 269   6.     Conturo, T.E., et al., *Diffusion MRI: precision, accuracy and flow effects*. *NMR in*  
270         *Biomedicine*, 1995. **8**(7): p. 307-332.
- 271   7.     Bernstein, M.A. and J.A. Polzin, *Method and system for correcting errors in MR images*  
272         *due to regions of gradient non-uniformity for parametric imaging such as quantitative flow*  
273         *analysis*. 2000, Google Patents.
- 274   8.     Bammer, R., et al., *Assessment of spatial gradient field distortion in diffusion-weighted*  
275         *imaging*. *Proceedings of the International Society for Magnetic Resonance in Medicine* ,  
276         Honolulu, HI, 2002: p. 1172.

- 277 9. Robson, M. *Non-linear gradients on clinical MRI systems introduce systematic errors in*  
278 *ADC and DTI measurements.* in *Proceedings of the 10th Annual Meeting of ISMRM,*  
279 *Honolulu.* 2002.
- 280 10. Basser, P.J. and C. Pierpaoli, *Microstructural and physiological features of tissues*  
281 *elucidated by quantitative-diffusion-tensor MRI.* *Journal of Magnetic Resonance Imaging,*  
282 2011. **213**(2): p. 560-570.
- 283 11. Frank, L.R., *Anisotropy in high angular resolution diffusion-weighted MRI.* *Magnetic*  
284 *Resonance in Medicine: An Official Journal of the International Society for Magnetic*  
285 *Resonance in Medicine,* 2001. **45**(6): p. 935-939.
- 286 12. Bammer, R., et al., *Analysis and generalized correction of the effect of spatial gradient*  
287 *field distortions in diffusion-weighted imaging.* *Magnetic Resonance in Medicine: An*  
288 *Official Journal of the International Society for Magnetic Resonance in Medicine,* 2003.  
289 **50**(3): p. 560-569.
- 290 13. Setsompop, K., et al., *Pushing the limits of in vivo diffusion MRI for the Human*  
291 *Connectome Project.* *Neuroimage,* 2013. **80**: p. 220-233.
- 292 14. Malyarenko, D.I., et al., *Demonstration of nonlinearity bias in the measurement of the*  
293 *apparent diffusion coefficient in multicenter trials.* *J Magnetic resonance in medicine,*  
294 2016. **75**(3): p. 1312-1323.
- 295 15. Andersson, J.L. and S.N. Sotiropoulos, *An integrated approach to correction for off-*  
296 *resonance effects and subject movement in diffusion MR imaging.* *Neuroimage,* 2016. **125**:  
297 p. 1063-1078.
- 298 16. McNab, J.A., et al., *The Human Connectome Project and beyond: initial applications of*  
299 *300 mT/m gradients.* *Neuroimage,* 2013. **80**: p. 234-245.

- 300 17. Mesri, H.Y., et al., *The adverse effect of gradient nonlinearities on diffusion MRI: From*  
301 *voxels to group studies*. NeuroImage, 2019: p. 116127.
- 302 18. Tan, E.T., et al., *Improved correction for gradient nonlinearity effects in diffusion-weighted*  
303 *imaging*. Journal of Magnetic Resonance Imaging, 2013. **38**(2): p. 448-453.
- 304 19. Newitt, D.C., et al., *Gradient nonlinearity correction to improve apparent diffusion*  
305 *coefficient accuracy and standardization in the american college of radiology imaging*  
306 *network 6698 breast cancer trial*. Journal of Magnetic Resonance Imaging, 2015. **42**(4): p.  
307 908-919.
- 308 20. Malyarenko, D.I., B.D. Ross, and T.L. Chenevert, *Analysis and correction of gradient*  
309 *nonlinearity bias in apparent diffusion coefficient measurements*. Magnetic resonance in  
310 medicine, 2014. **71**(3): p. 1312-1323.
- 311 21. Malyarenko, D.I. and T.L. Chenevert, *Practical estimate of gradient nonlinearity for*  
312 *implementation of apparent diffusion coefficient bias correction*. Journal of Magnetic  
313 Resonance Imaging, 2014. **40**(6): p. 1487-1495.
- 314 22. Sotiropoulos, S.N., et al., *Advances in diffusion MRI acquisition and processing in the*  
315 *Human Connectome Project*. Neuroimage, 2013. **80**: p. 125-143.
- 316 23. Glasser, M.F., et al., *The minimal preprocessing pipelines for the Human Connectome*  
317 *Project*. Neuroimage, 2013. **80**: p. 105-124.
- 318 24. Janke, A., et al., *Use of spherical harmonic deconvolution methods to compensate for*  
319 *nonlinear gradient effects on MRI images*. Magnetic Resonance in Medicine: An Official  
320 Journal of the International Society for Magnetic Resonance in Medicine, 2004. **52**(1): p.  
321 115-122.



- 322 25. Doran, S.J., et al., *A complete distortion correction for MR images: I. Gradient warp*  
323 *correction*. Physics in Medicine & Biology, 2005. **50**(7): p. 1343.
- 324 26. Tao, S., et al., *Integrated image reconstruction and gradient nonlinearity correction*.  
325 Magnetic resonance in medicine, 2015. **74**(4): p. 1019-1031.
- 326 27. Rogers, B.P., et al. *Phantom-based field maps for gradient nonlinearity correction in*  
327 *diffusion imaging*. in *Medical Imaging 2018: Physics of Medical Imaging*. 2018.  
328 International Society for Optics and Photonics.
- 329 28. Rogers, B.P., et al. *Stability of gradient field corrections for quantitative diffusion MRI*. in  
330 *Medical Imaging 2017: Physics of Medical Imaging*. 2017. International Society for Optics  
331 and Photonics.
- 332 29. Tough, R.J. and A.J. Stone, *Properties of the regular and irregular solid harmonics*.  
333 Journal Of Physics A: Mathematical General, 1977. **10**(8): p. 1261.
- 334 30. Caola, M., *Solid harmonics and their addition theorems*. Journal of Physics A:  
335 Mathematical General, 1978. **11**(2): p. L23.
- 336 31. Mattiello, J., P.J. Basser, and D. Le Bihan, *The b matrix in diffusion tensor echo-planar*  
337 *imaging*. Magnetic Resonance in Medicine, 1997. **37**(2): p. 292-300.
- 338 32. Mattiello, J., P.J. Basser, and D. LeBihan, *Analytical expressions for the b matrix in NMR*  
339 *diffusion imaging and spectroscopy*. Journal of magnetic resonance, Series A, 1994.  
340 **108**(2): p. 131-141.
- 341 33. Alger, J.R., *The diffusion tensor imaging toolbox*. Journal of Neuroscience, 2012. **32**(22):  
342 p. 7418-7428.

- 343 34. Andersson, J.L., S. Skare, and J. Ashburner, *How to correct susceptibility distortions in*  
344 *spin-echo echo-planar images: application to diffusion tensor imaging*. Neuroimage, 2003.  
345 **20**(2): p. 870-888.
- 346 35. Pierpaoli, C., et al. *Polyvinylpyrrolidone (PVP) water solutions as isotropic phantoms for*  
347 *diffusion MRI studies*. in *Proc Intl Soc Magn Reson Med*. 2009.
- 348 36. Jenkinson, M., et al., *Improved optimization for the robust and accurate linear registration*  
349 *and motion correction of brain images*. Neuroimage, 2002. **17**(2): p. 825-841.
- 350 37. Lee, Y., et al., *A comprehensive approach for correcting voxel-wise b-value errors in*  
351 *diffusion MRI*. 2019.

352

353  
354

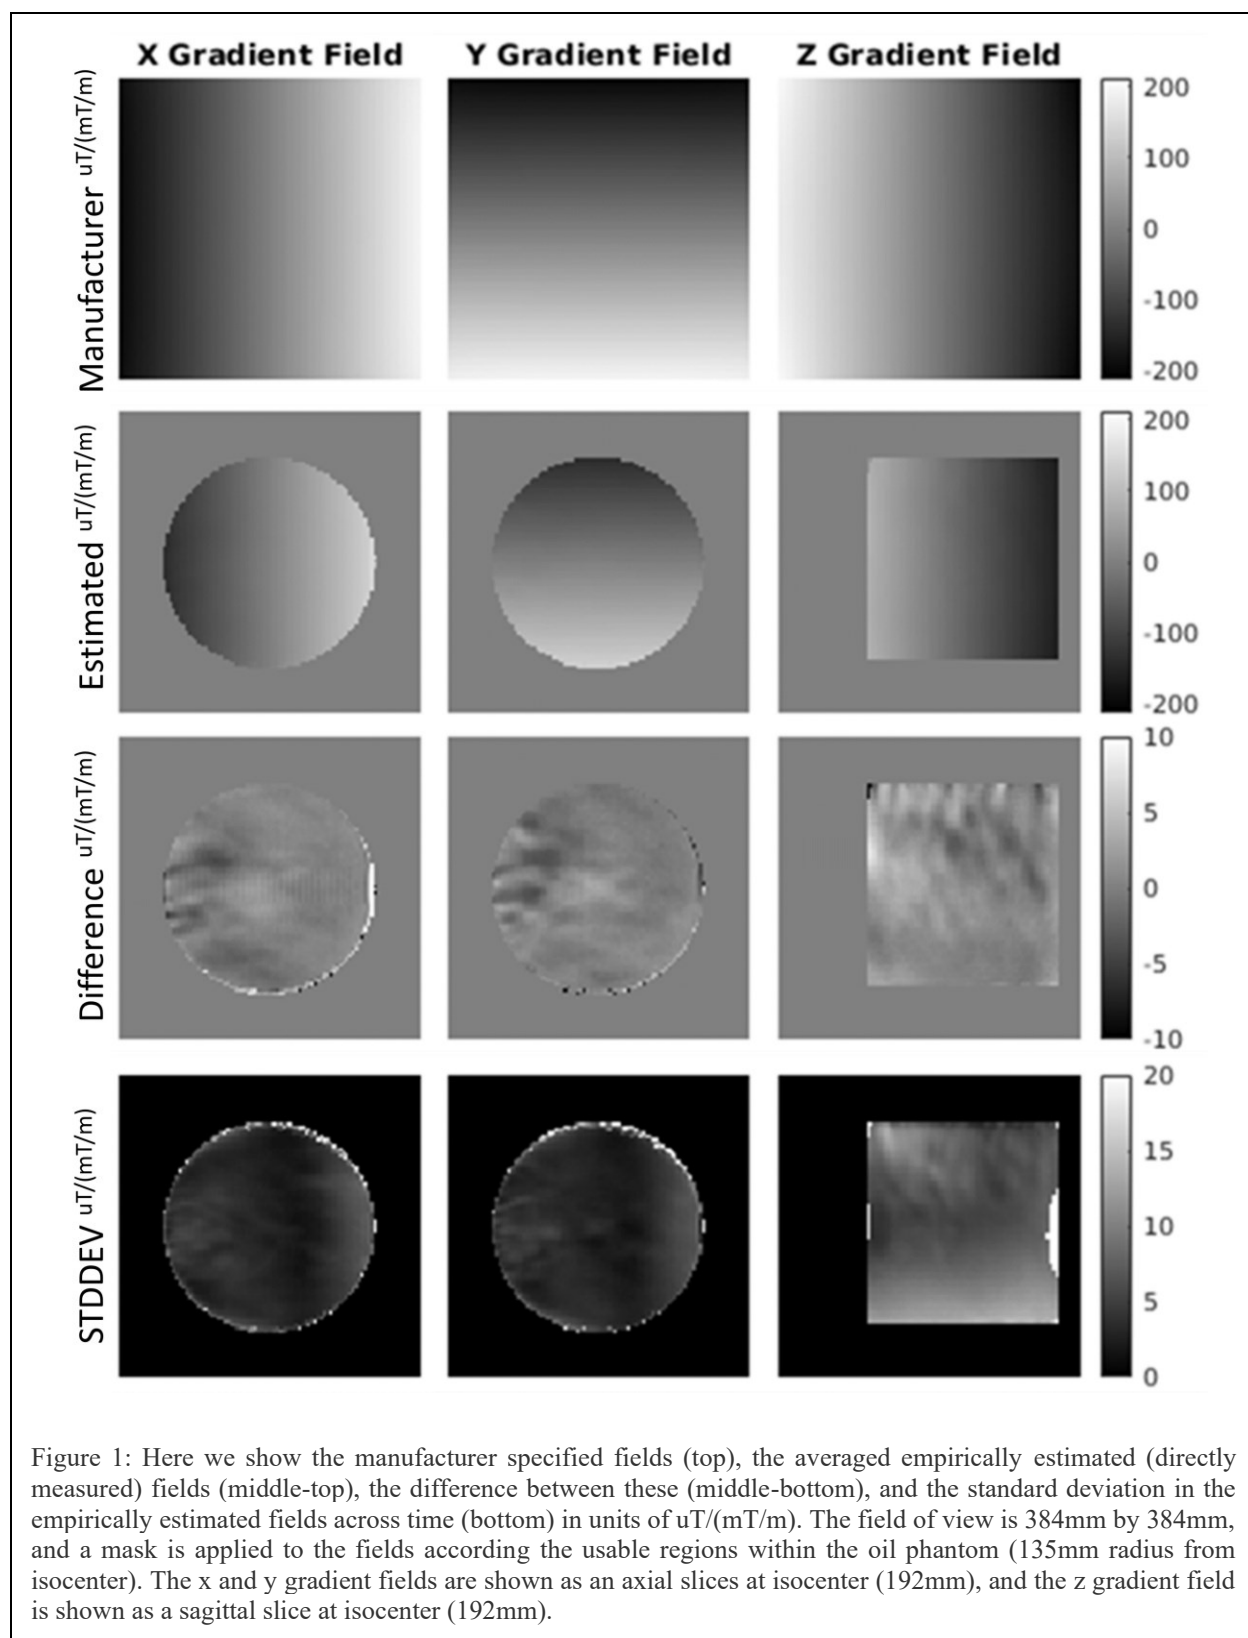

356

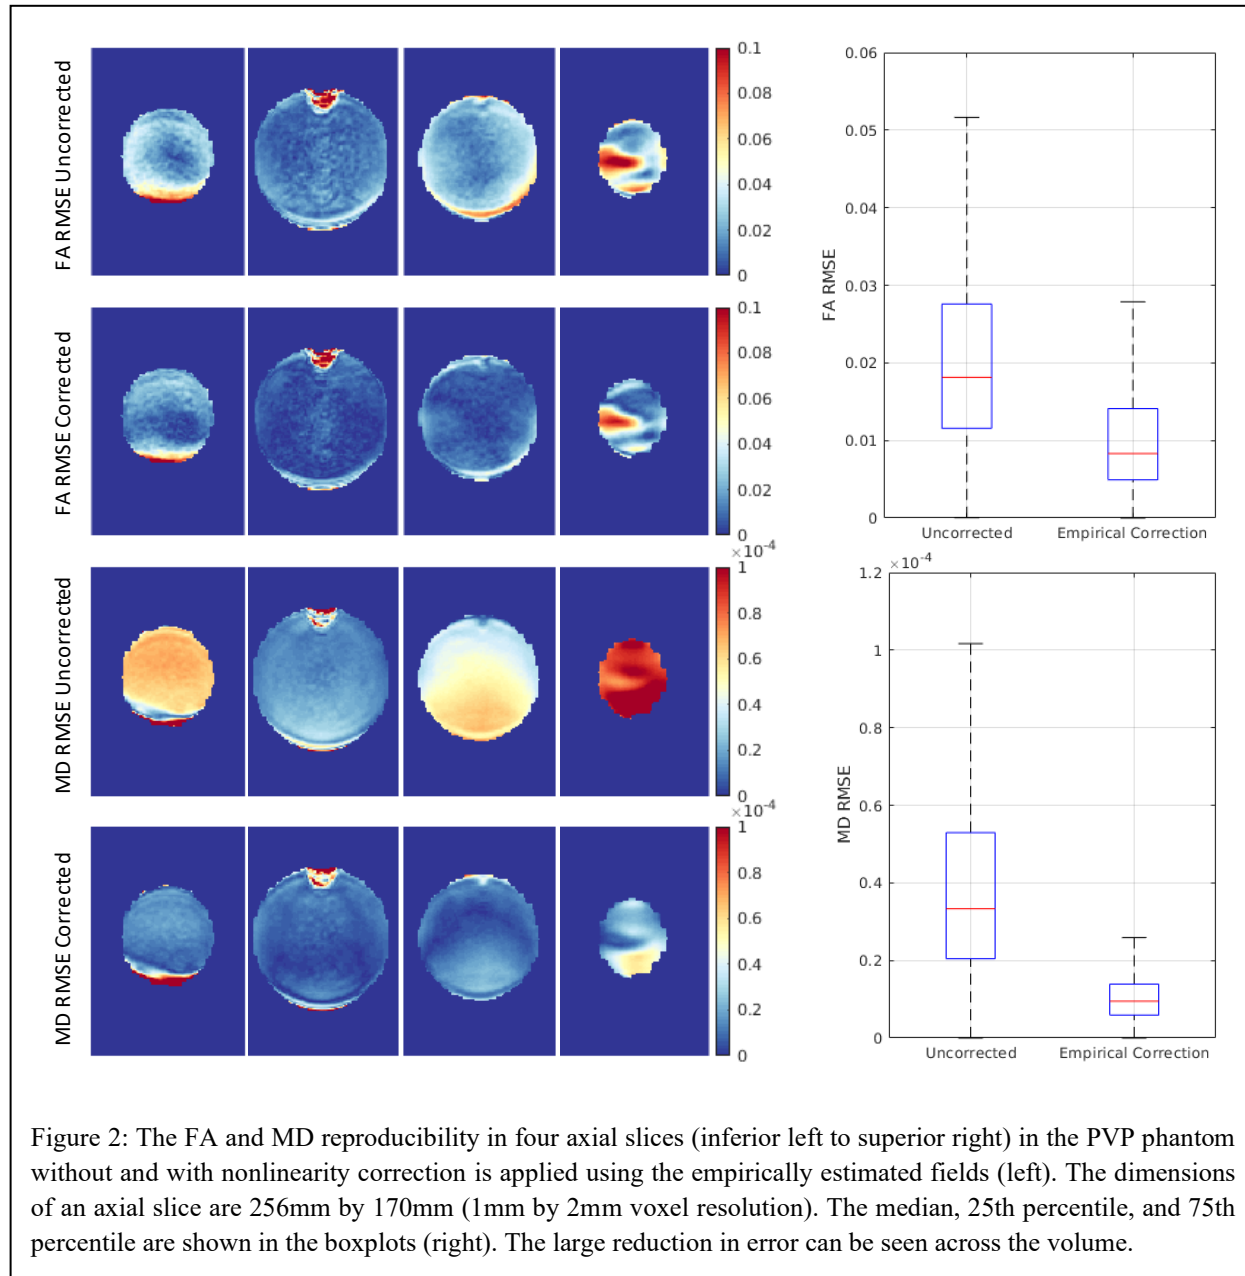

357

358

359

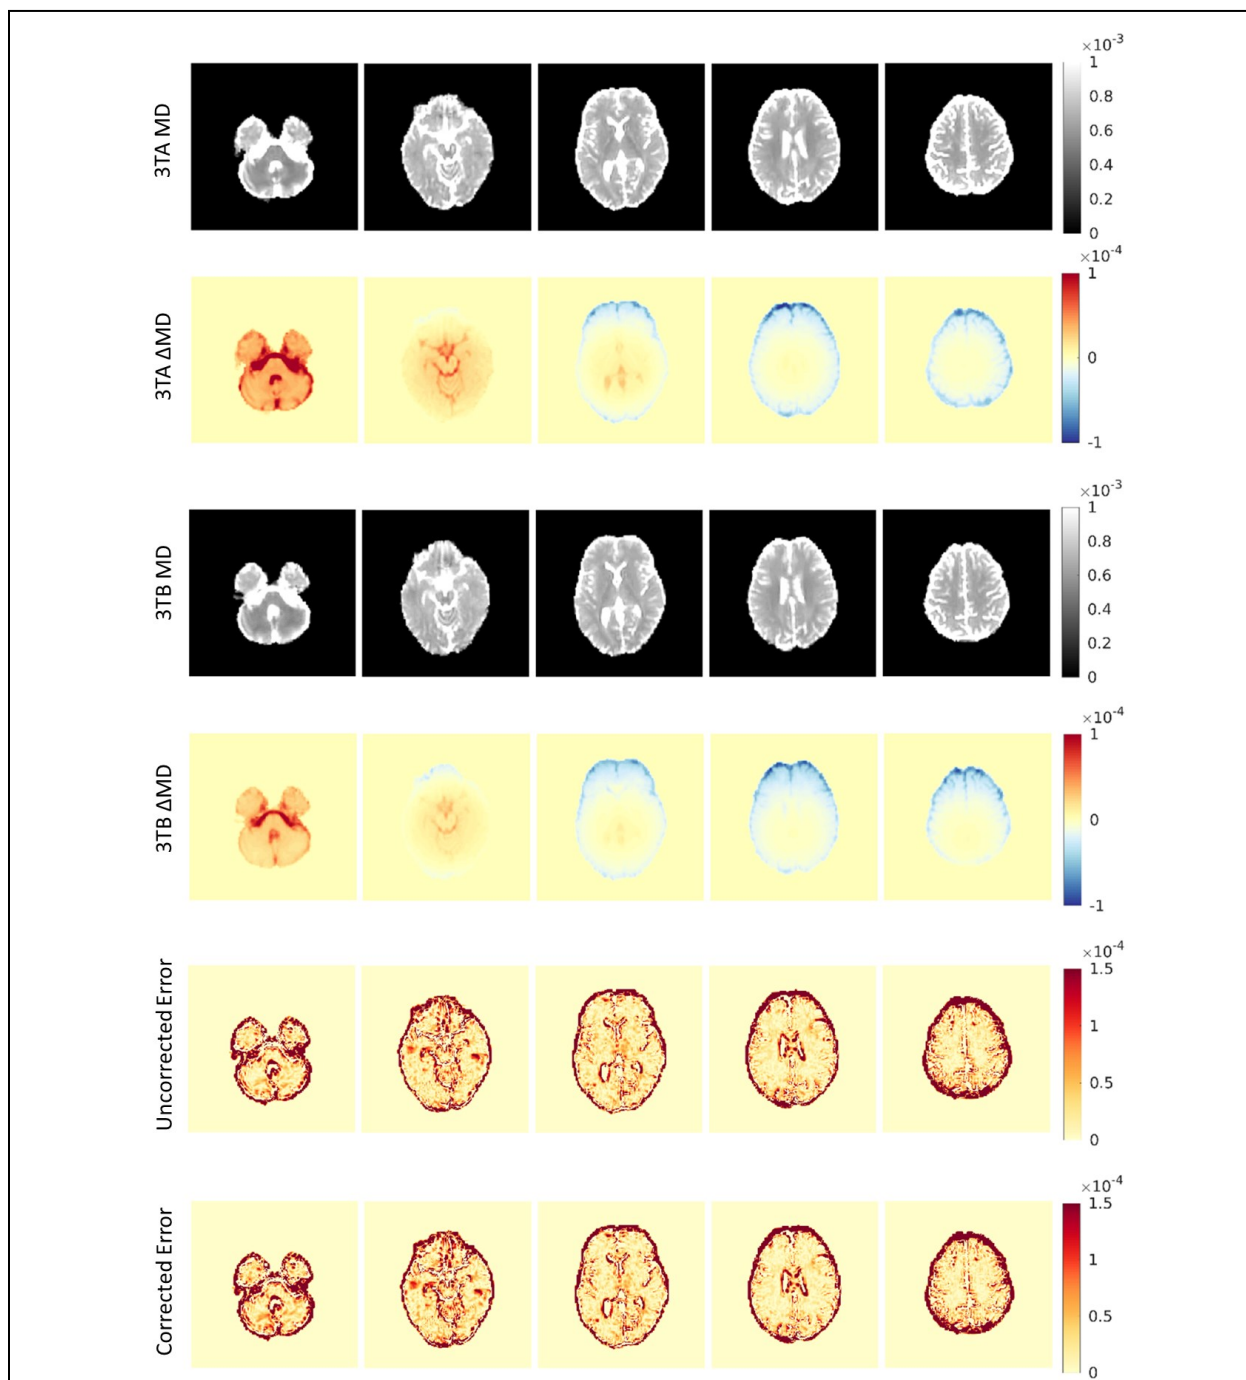

Figure 3: For the DW-MRI acquisitions at scanner A (3TA) and scanner B (3TB) acquired at isocenter as is typical, we show MD at scanner A, the change in MD with nonlinearity correction at scanner A, the MD at scanner B, the change in MD with nonlinearity correction at scanner B, the absolute reproducibility error without nonlinearity correction, and the absolute reproducibility with nonlinearity correction from top row to bottom row for five axial slices. A mask is used to exclude CSF regions in the error.

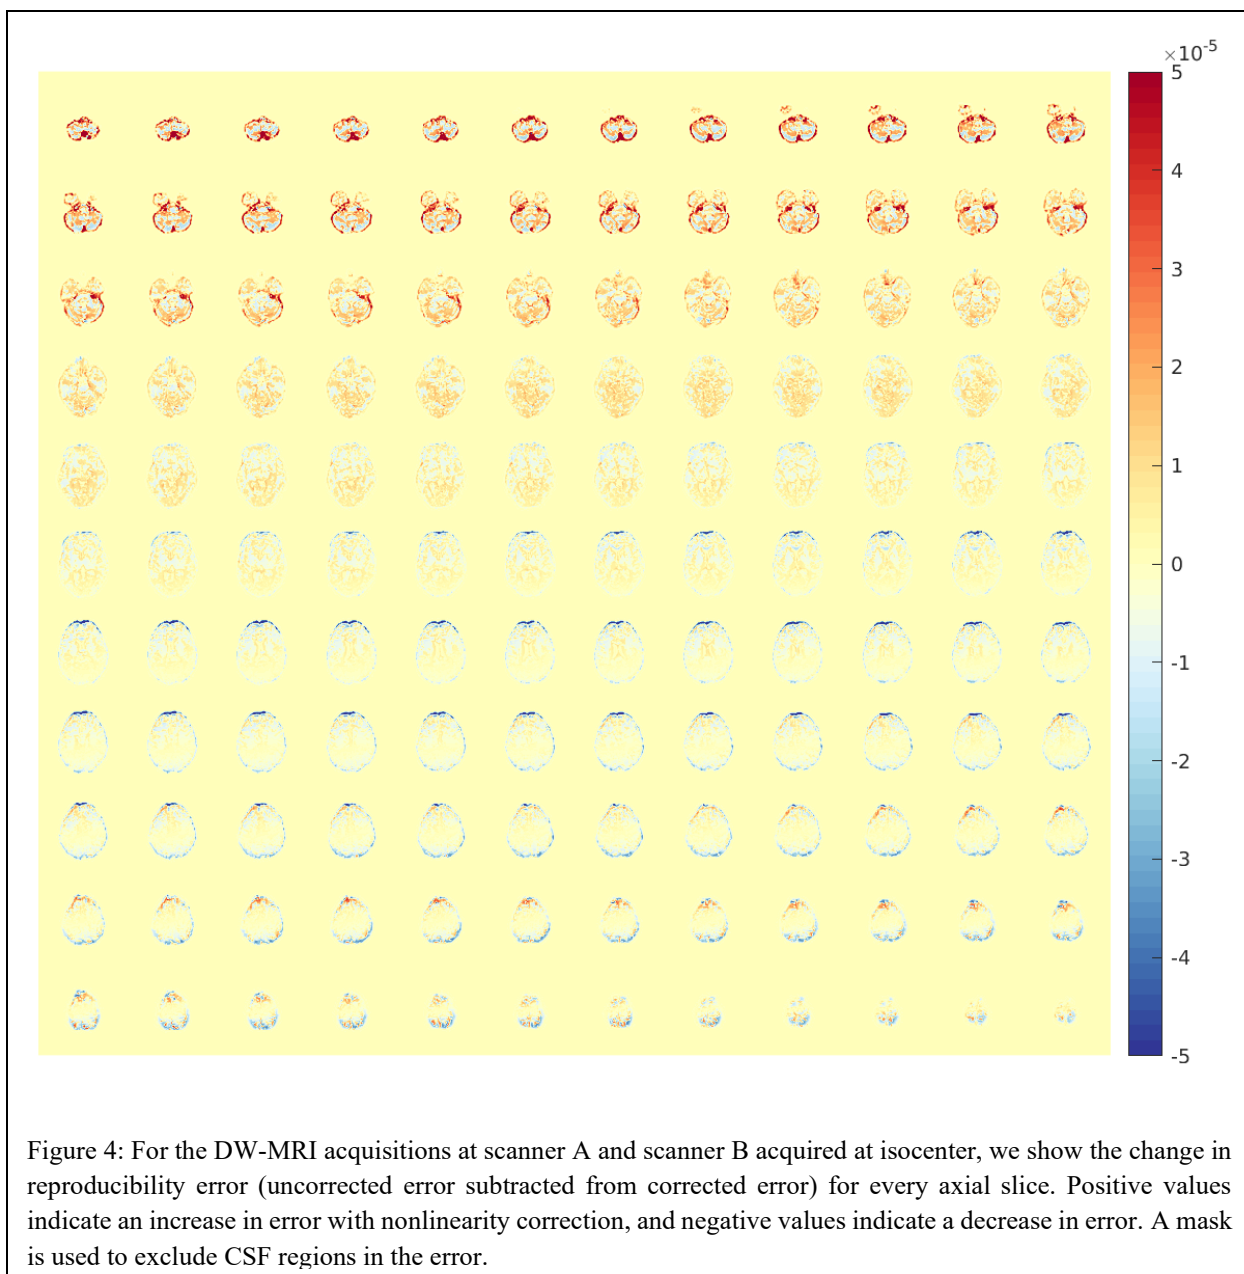

360

361

362

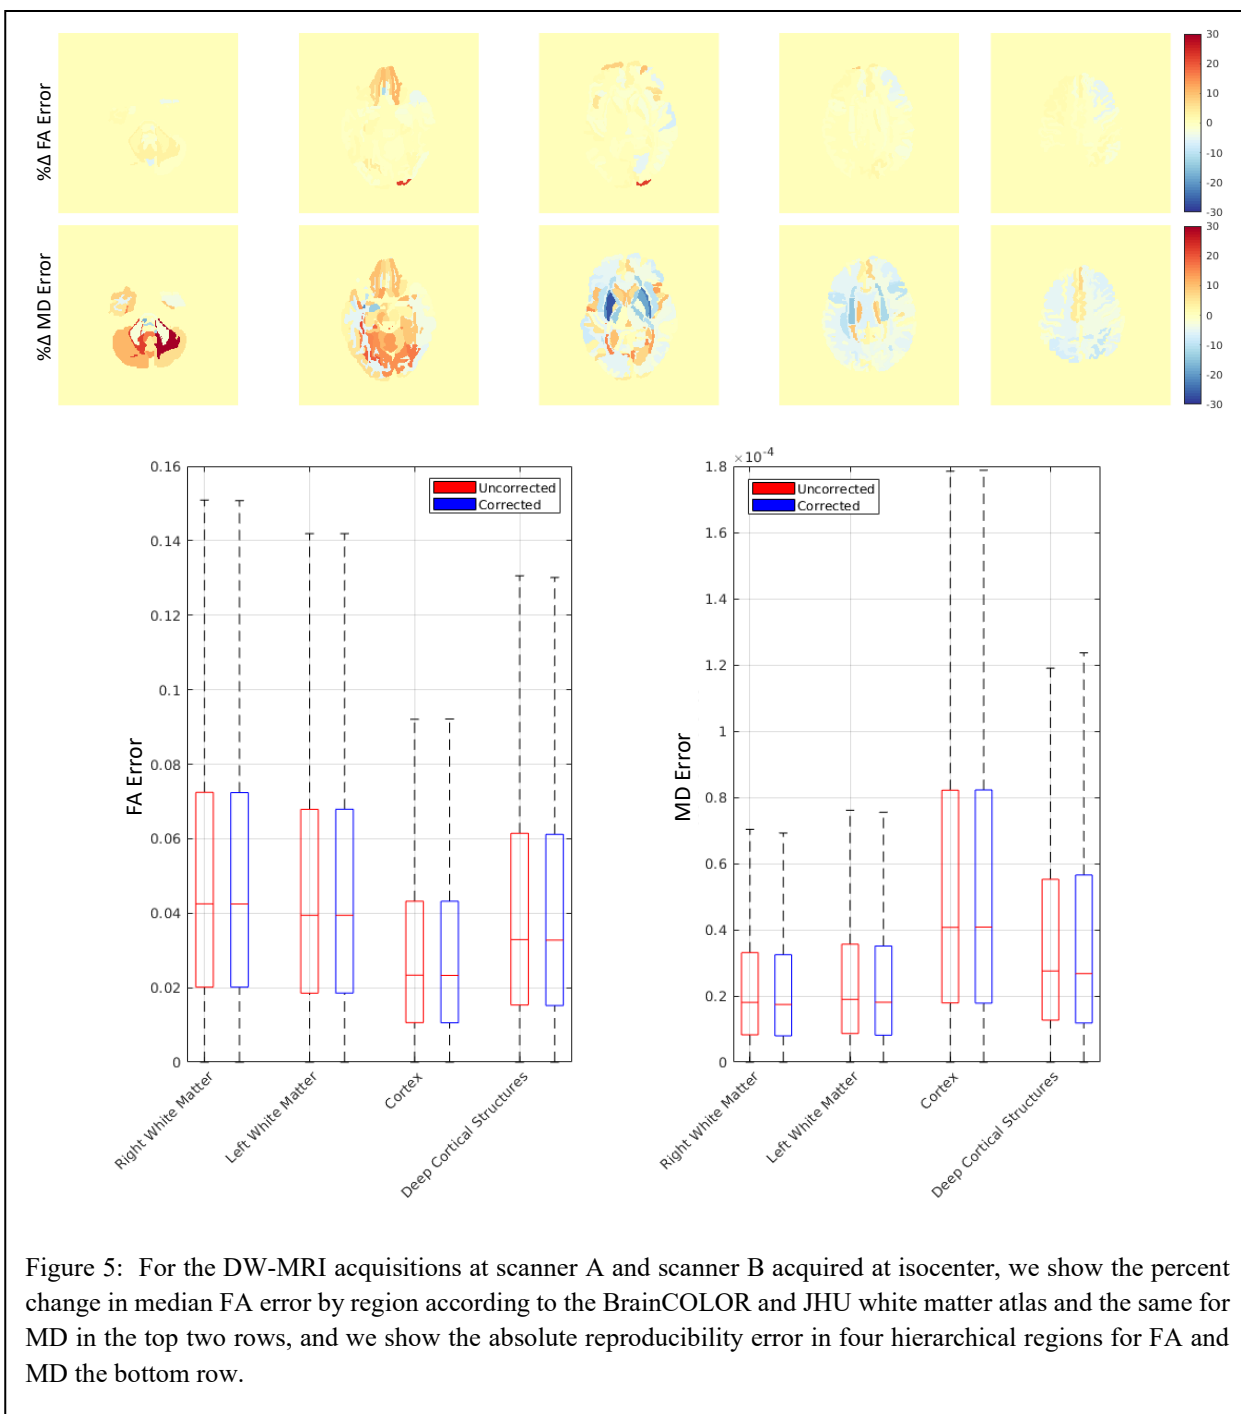

Figure 5: For the DW-MRI acquisitions at scanner A and scanner B acquired at isocenter, we show the percent change in median FA error by region according to the BrainCOLOR and JHU white matter atlas and the same for MD in the top two rows, and we show the absolute reproducibility error in four hierarchical regions for FA and MD the bottom row.



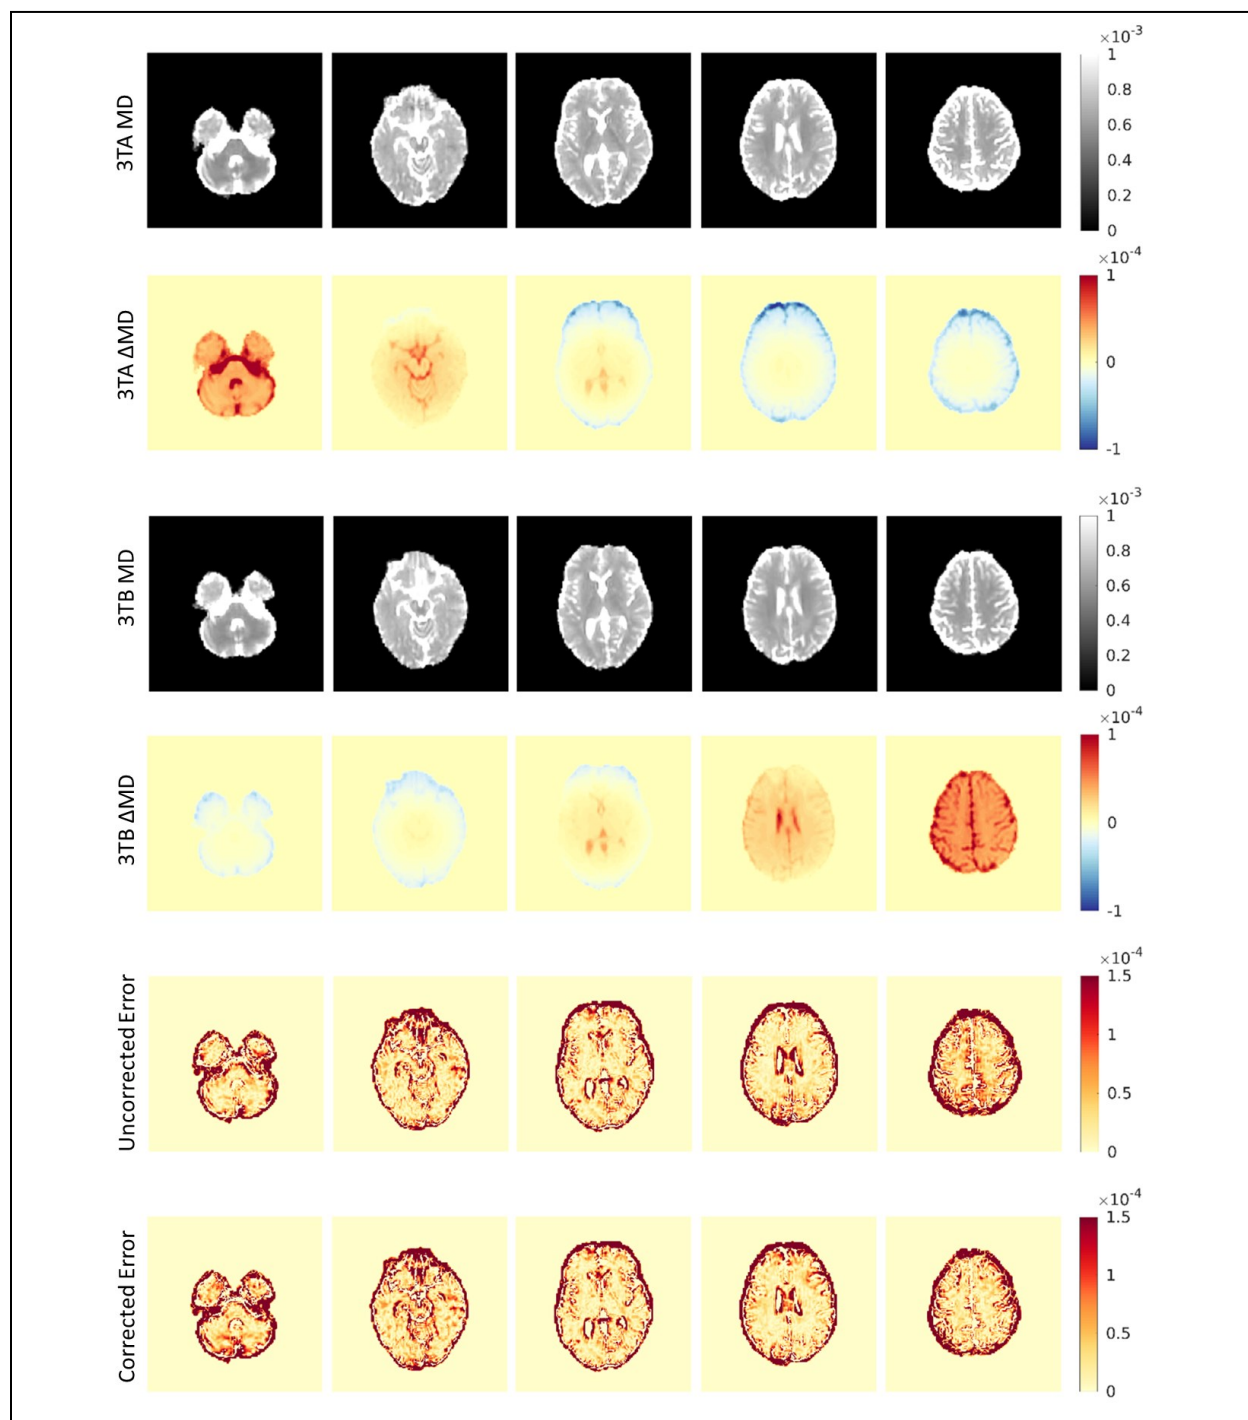

Figure 6: For the DW-MRI acquisitions at scanner A (3TA) acquired at isocenter and scanner B (3TB) acquired 6cm superior to isocenter, we show MD at scanner A, the change in MD with nonlinearity correction at scanner A, the MD at scanner B, the change in MD with nonlinearity correction at scanner B, the absolute reproducibility error without nonlinearity correction, and the absolute reproducibility with nonlinearity correction from top row to bottom row for five axial slices. A mask is used to exclude CSF regions in the error.



365

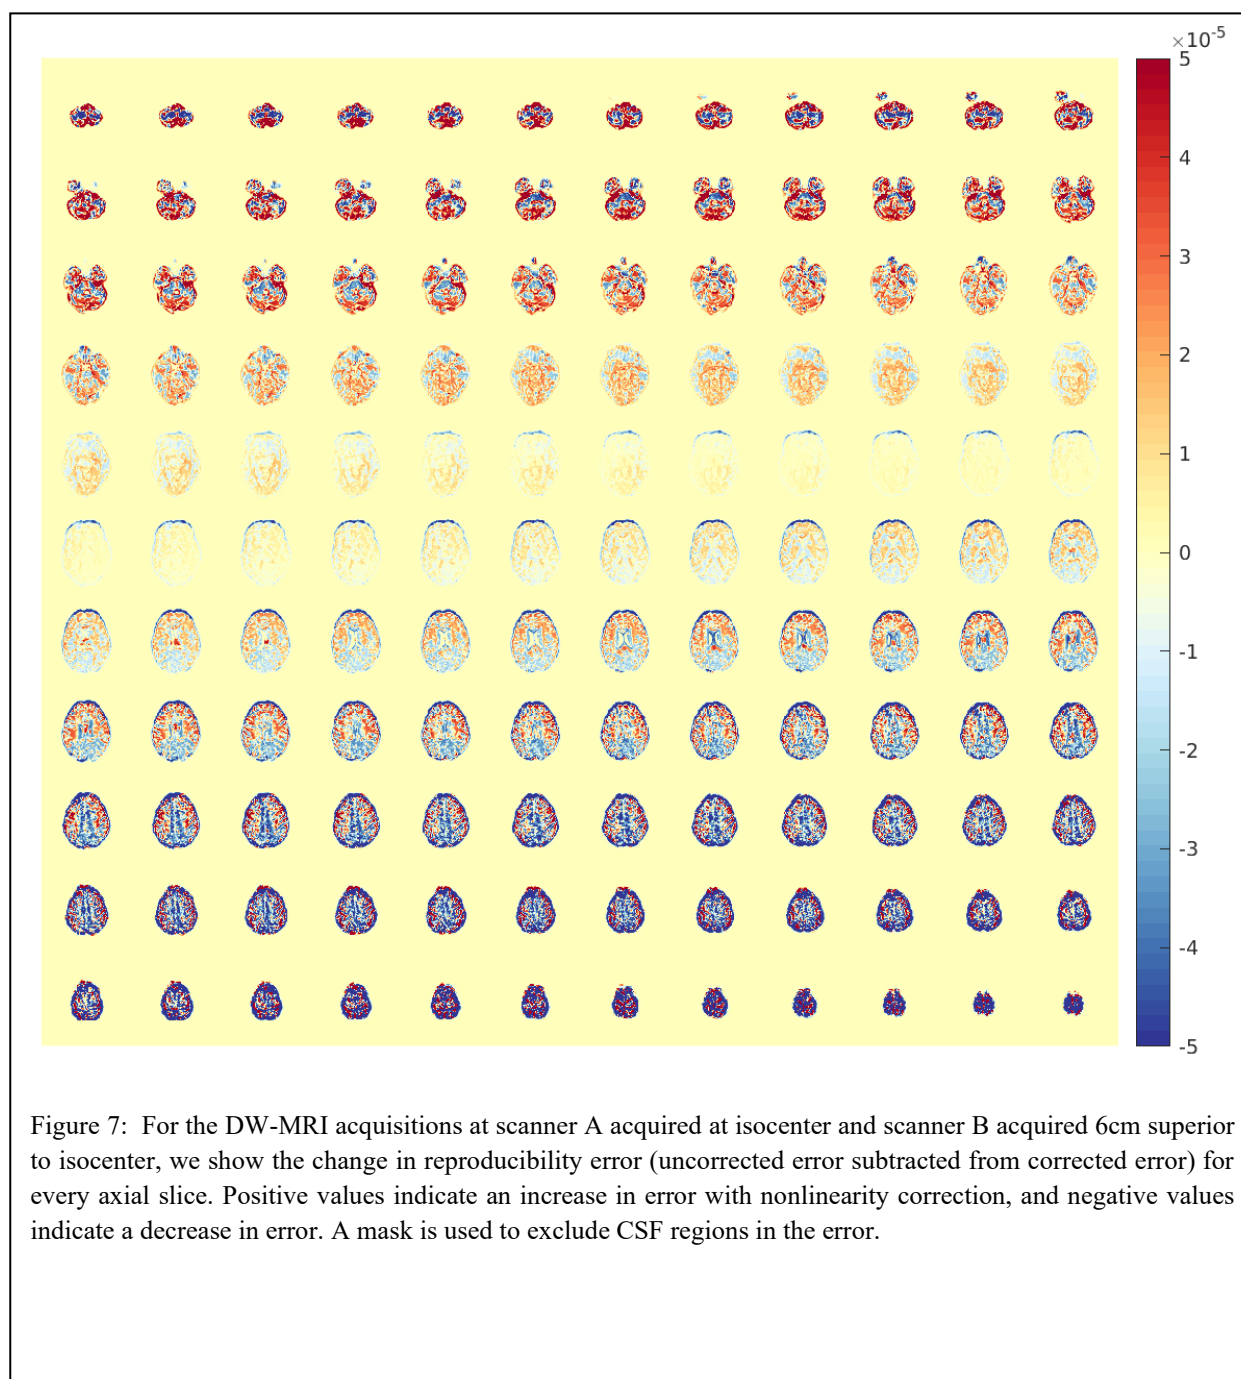

366

367

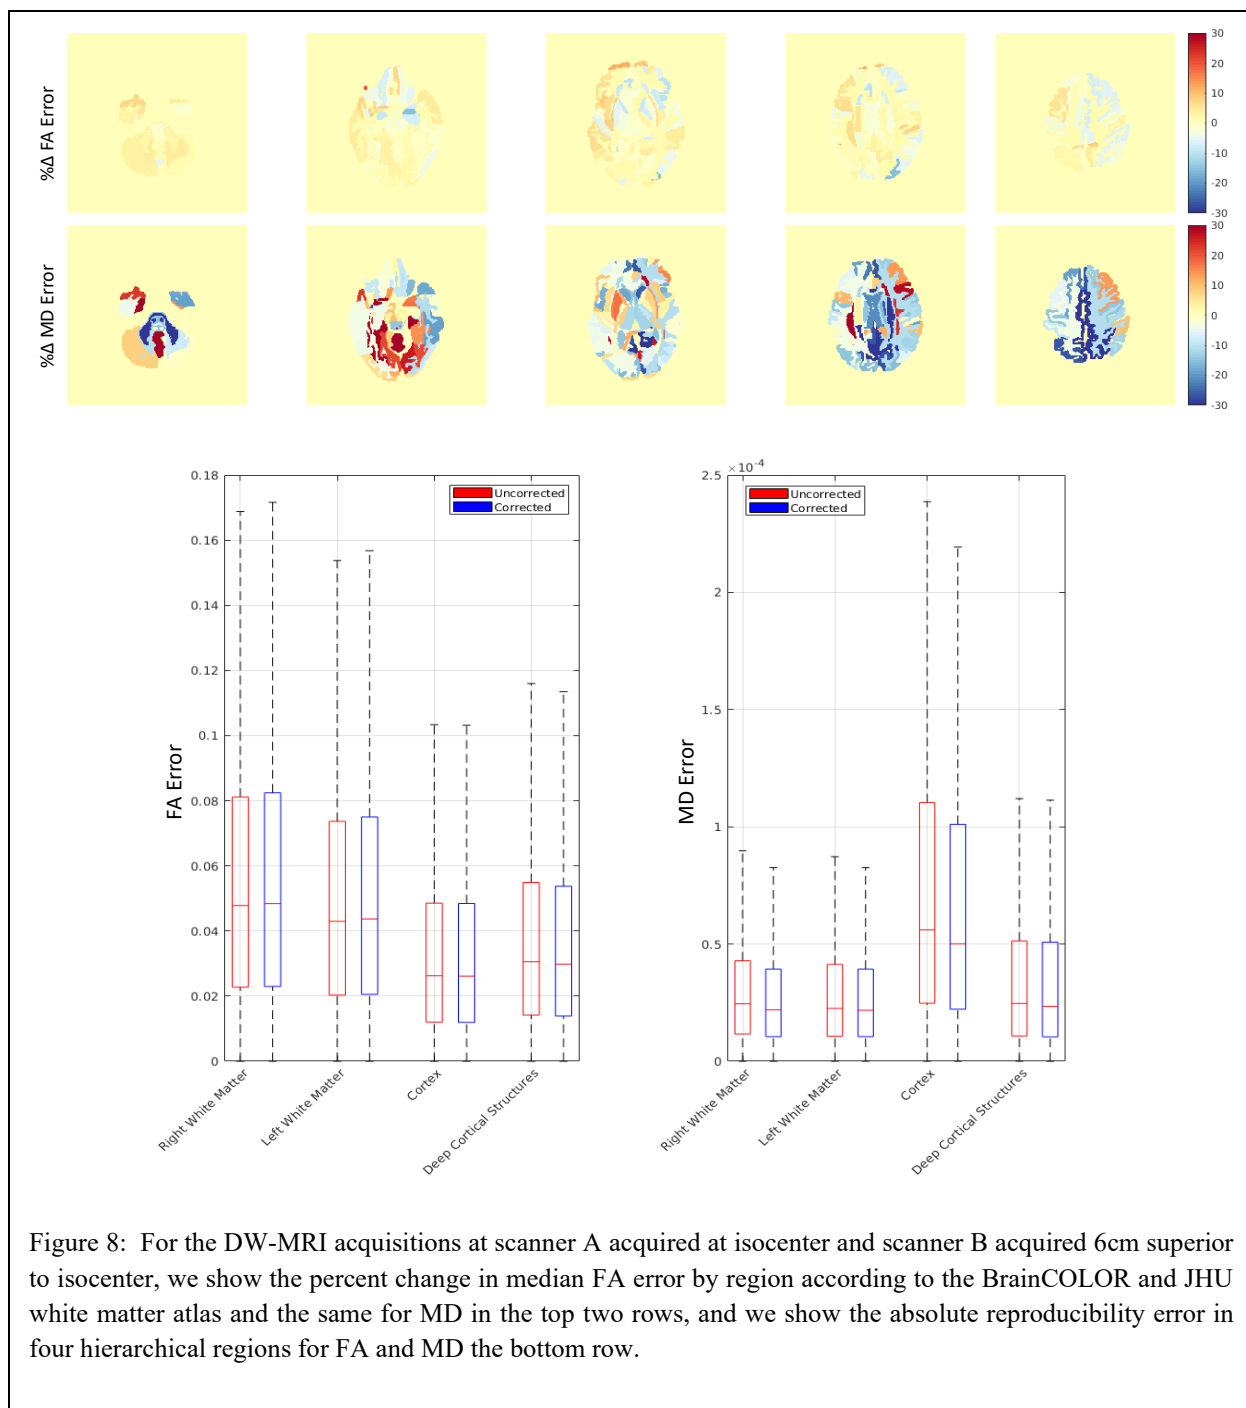

Source: https://www.biorxiv.org/content/biorxiv/early/2020/05/20/2020.05.18.102558.full.pdf
